## Correction: Neuroprotective effects of bajijiasu against cognitive impairment induced by amyloid- $\beta$ in APP/PS1 mice

Haobin Cai<sup>2,1</sup>, Yijie Wang<sup>1</sup>, Jiayang He<sup>1</sup>, Tiantian Cai<sup>1</sup>, Jun Wu<sup>1</sup>, Jiansong Fang<sup>1</sup>, Rong Zhang<sup>1</sup>, Zhouke Guo<sup>2</sup>, Li Guan<sup>1</sup>, Qinkai Zhan<sup>1</sup>, Li Lin<sup>3</sup>, Yao Xiao<sup>4</sup>, Huafeng Pan<sup>1</sup> and Qi Wang<sup>1</sup>

<sup>1</sup> Institute of Clinical Pharmacology, Guangzhou University of Chinese Medicine, Guangzhou 510405, China

<sup>2</sup> Department of Neurology & Psychology, Shenzhen Traditional Chinese Medicine Hospital, Guangzhou University of Chinese Medicine, Shenzhen 518033, China

<sup>3</sup> Guangzhou University of Chinese Medicine, Guangzhou 510405, China

<sup>4</sup> Guangzhou Medical University, Guangzhou 510182, China

**Published:** May 22, 2018

**Copyright:** Cai et al. This is an open-access article distributed under the terms of the Creative Commons Attribution License 3.0 (CC BY 3.0), which permits unrestricted use, distribution, and reproduction in any medium, provided the original author and source are credited.

**This article has been corrected:** The correct 2nd affiliation and author name is given below:

**Haobin Cai<sup>2,1</sup>**

<sup>2</sup> Department of Neurology & Psychology, Shenzhen Traditional Chinese Medicine Hospital, Guangzhou University of Chinese Medicine, Shenzhen 518033, China

Original article: Oncotarget. 2017; 8:92621-92634. <https://doi.org/10.18632/oncotarget.21515>
